# Supplementary material for: Characterisation of cell functions and receptors in Chronic Fatigue Syndrome/Myalgic Encephalomyelitis (CFS/ME)
Source: BMC Immunol. 2015 Jun 2;16:35. doi: 10.1186/s12865-015-0101-4 (PMC4450981; doi:10.1186/s12865-015-0101-4)
Supplement: Additional file 6: Table S1. — Monoclonal antibody combinations used to identify various innate and adaptive immune cells and phenotypes. [file 12865_2015_101_MOESM6_ESM.docx]

**Additional Table 1:** **Monoclonal antibody combinations used to identify various innate and adaptive immune cells and phenotypes.**

| **Cell** | **Measured Phenotype** | **Monoclonal Antibody Marker Combinations** |
| --- | --- | --- |
| **NK Cells** | **Phenotypes**:  **Integrins**:  **SLAM:**  **NCRs:** | CD3-CD56+/-CD16+/-  CD2, CD18, CD11b, CD11c  CD150,  NKp30, NKp44, NKp46, NKp80 |
| **CD8+T and CD4+T cells** | **CD8**  **CD4**  **Phenotypes**  **KIRs**  **Receptors and Markers:** | CD8+CD3+  CD4+CD3+  Naïve: CD45RA+CD27+  Central Memory: CD45RA-CD27+  Effector Memory: CD45RA-CD27-  CD45RA+ Effector Memory: CD45RA+CD27-  KIR2DL1 (CD158a), KIR3DL1 (CD158e), KIR2DL2/DL3 (CD158b), KIR2DS4 (CD158i), KIR2DL1/DS1 (CD158a/h), KIR3DL1/DL2 (CD158e/k), KIR2DL5 (CD158f), NKG2D (CD314), NKG2 (CD94)  PD1, CD160, TIM3, 2B4, CD44, PSGL, CD62L, CXCR3, CD49d/CD29, LFA-1, KLRG1, CD127, BLTA4, CTLA4, Tregs (CD25+CD28+CD56+), CCR5, CD28, CCR7 |
| **iNKT Cells** | **Lytic Proteins:** | 6B11+CD3+  Perforin, GranzymeA, GranzymeB |
| **Tregs** | **Lytic Proteins:** | CD127lowCD25+CD3+CD4+  Perforin, GranzymeA, GranzymeB |
| **γδ T cells** | **γδ 1 T cells:**  **γδ 2 T cells:**  **Phenotypes:**  **Lytic Proteins:** | γδ 1+CD3+CD45RA+/-CD27+/-  γδ 2+CD3+CD45RA+/-CD27+/-  Naïve: γδ+CD3+CD45RA+CD27+  Central Memory: γδ+CD3+CD45RA-CD27+  Effector Memory: γδ+CD3+CD45RA-CD27-  CD45RA+ Effector Memory: γδ+CD3+CD45RA+CD27-  Perforin, GranzymeA, GranzymeB |
| **DCs** | **Phenotypes:** | CD14-CD16+ DCs: Lin2-HLA-DR+CD16+  pDCs: Lin2-HLA-DR+CD123+  mDCs: Lin2-HLA-DR+CD33+ |
| **B Cells** | **BCRs:**  **Breg:** | CD19+  CD79a, CD79b, IgA, IgE, IgD, IgM, CD154,  CD27-CD19+CD5+CD1d+CD81+/-, CD21+/- |

Additional Table 1 shows the monoclonal antibody combinations used to identify each of the cells and parameters for gating on the flow cytometer.
